# Supplementary material
Source: MDPI journal article supplement (https://www.mdpi.com/2673-4591/10/1/68)
Supplement: s1 [file s1]

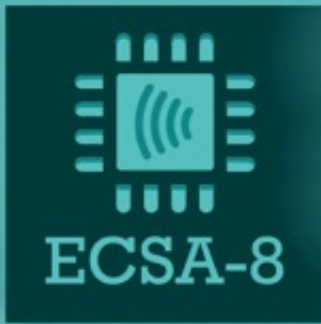

# The 8th International Electronic Conference on Sensors and Applications

01-15 NOVEMBER 2021 | ONLINE

## MMI sensor for diameter measurement

Victor Cardoso, Paulo Caldas, Maria Thereza Giraldi, Cindy Fernandes,  
Orlando Frazão, João Costa and José Luís Santos

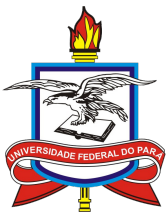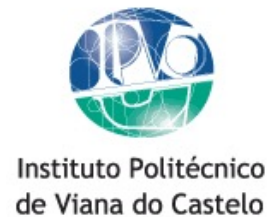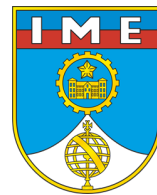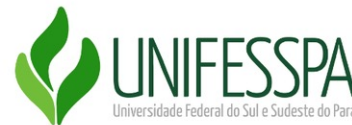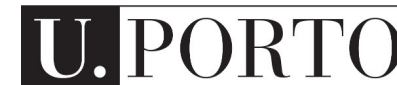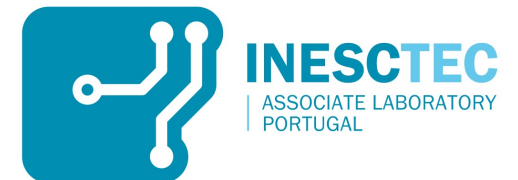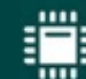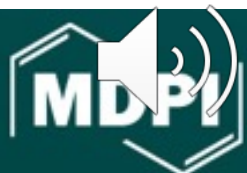

# Introduction

## Radial growth control:

- Oil or gas transportation infrastructure the pressure in the pipeline is high, causing deformation and/or fatigue and consequently a disruption;
- The monitoring of the tree diameter change is directly related to irrigation, since it depends on the soil water deficit and trees are important in the global circulation of heat and water, in addition, tree growth is affected by the CO<sub>2</sub> rate and air pollutant.

# Introduction

## Multimodal Interference (MMI)

- Devices based on fiber optics have been extensively investigated in recent years for different applications as sensors to detect physical parameters such as:
  1. Temperature;
  2. Strain;
  3. Vibration;
  4. Flow rate.

# Introduction

## Multimodal Interference (MMI) – SMS structure

- A traditional SMS structure, consists of a short MMF section spliced between two SMFs;
- The MMF couples part of the light that travels along the core of the input SMF to the cladding of the output SMF, and this coupling induces a loss of power in the transmitted signal that travels along the core.

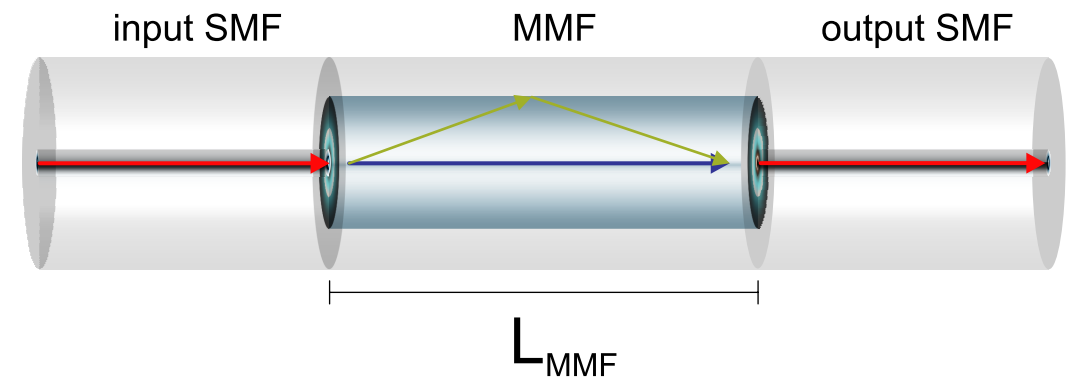

# Experimental Setup

- It was used a linear translation stage, to apply tension by moving the linear stage away from the fixed support. Thus, it is possible to introduce a strain force in the sensor
- Two cylindrical structures were developed on a 3D printer, with different diameter sizes ( $d_0$ ), 80 mm and 110 mm, to assist in monitoring the diameter changes ( $\Delta d$ );
- Fixed points: 5, 10 and 15 mm.

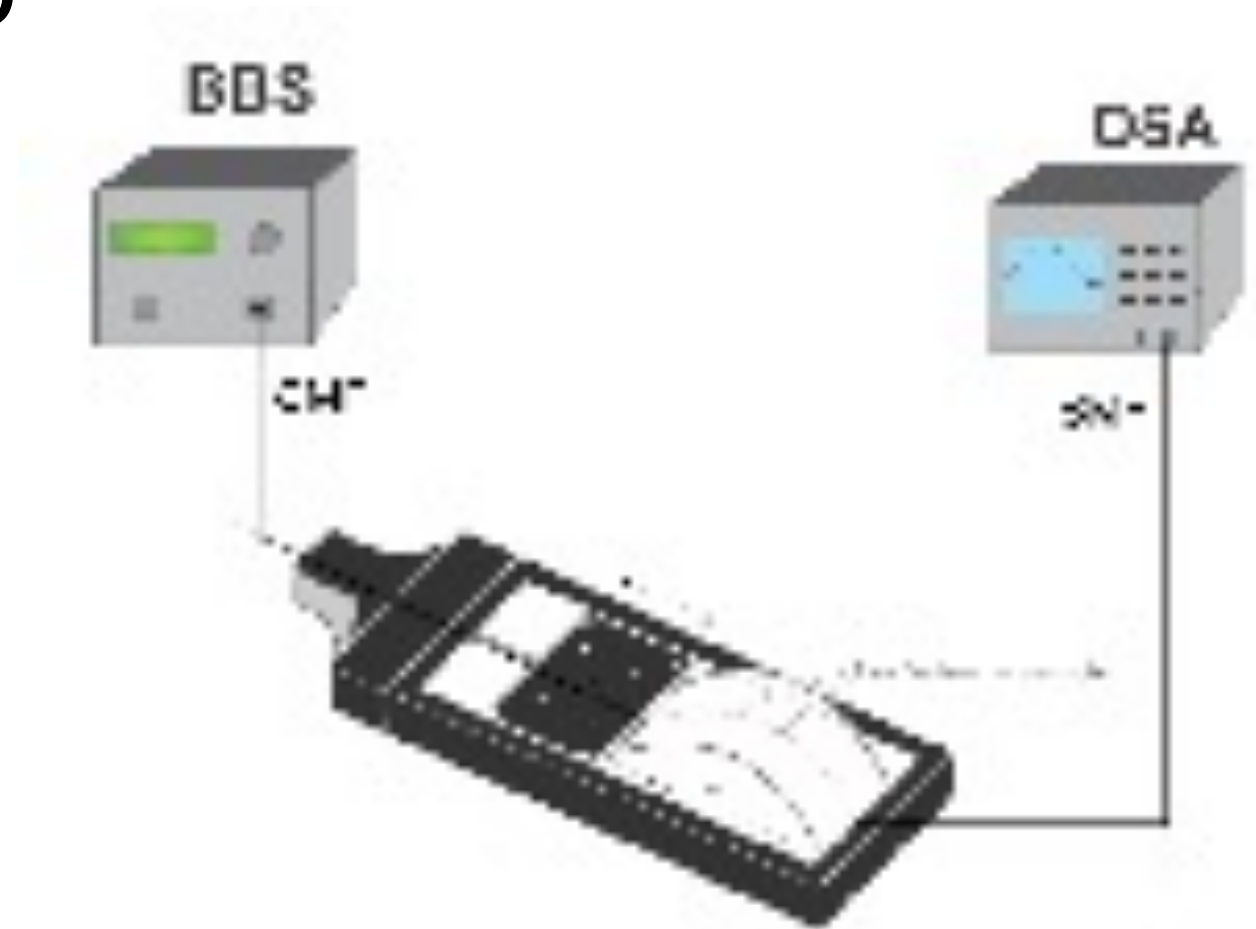

# Experimental Setup

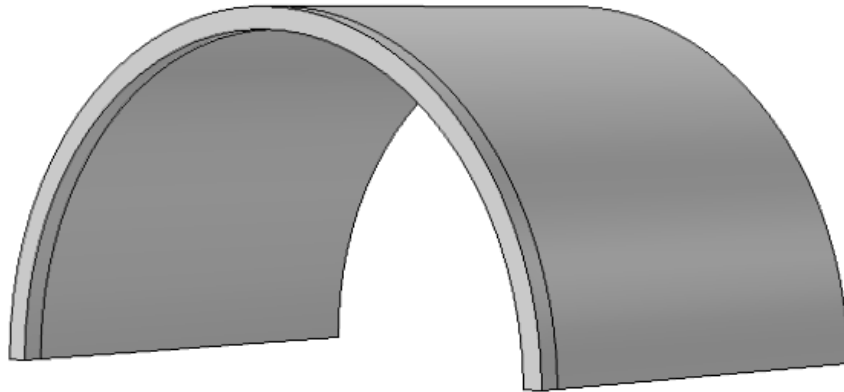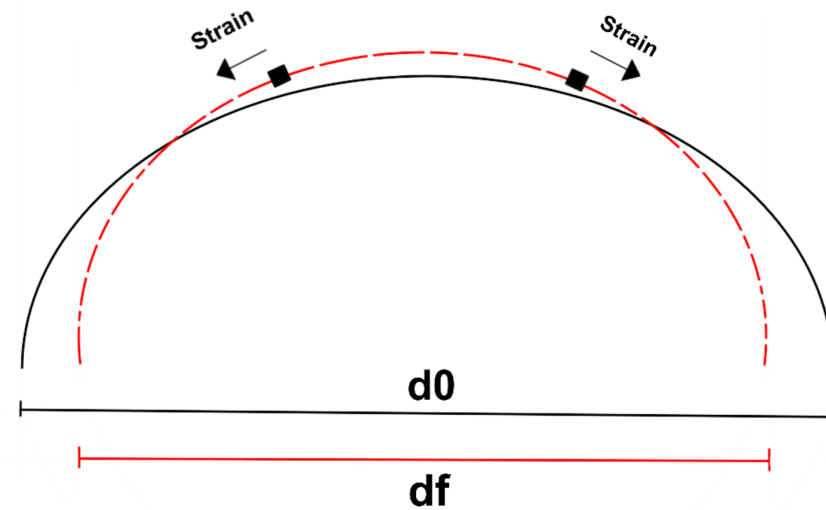

# Results and Discussion – DS: 80 mm

- The sensor presents dips shift of the transmittance spectrum due to the induced curvature and strain force;

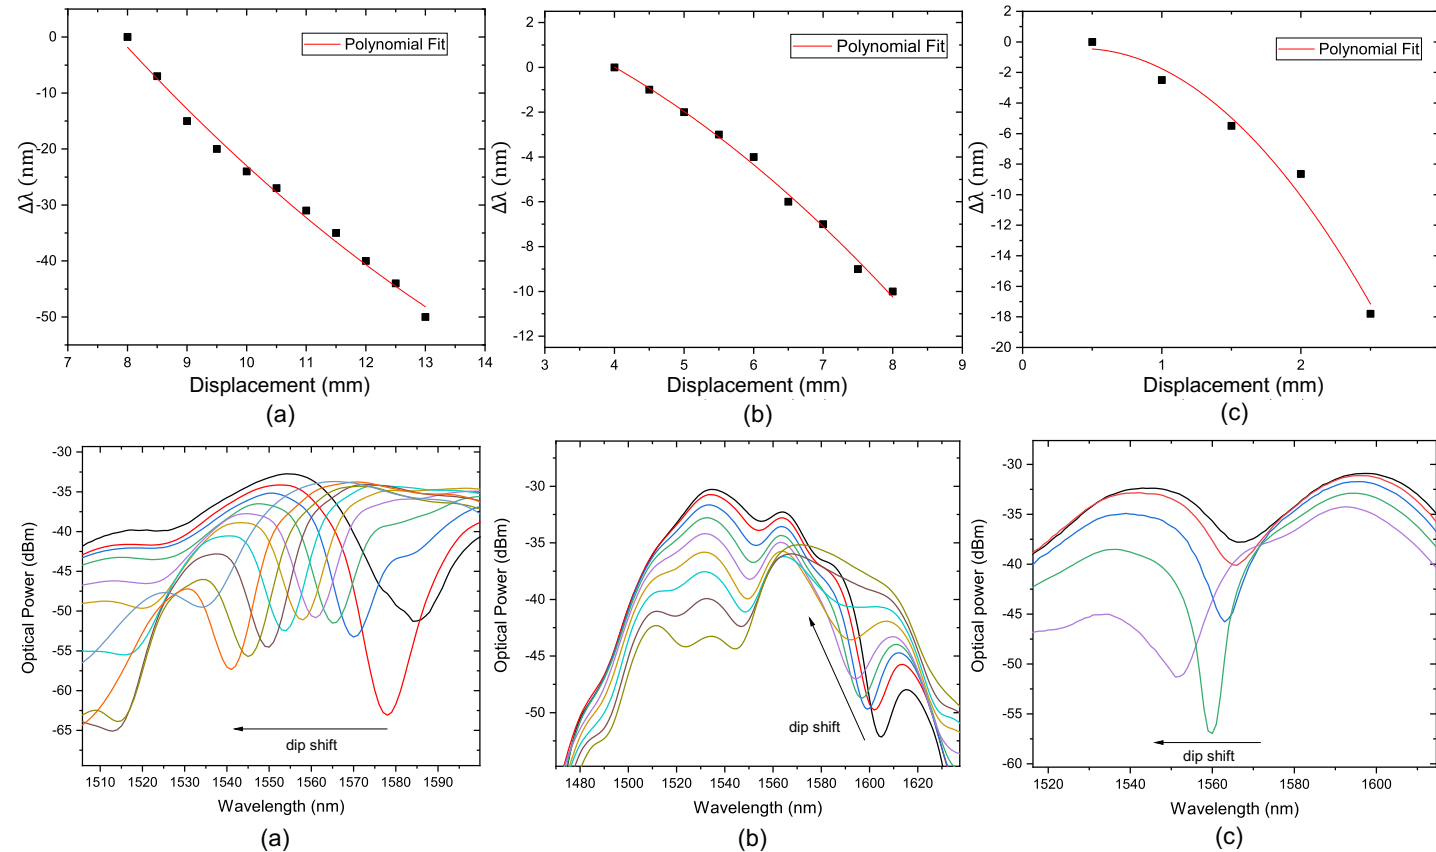

| Fixed points (mm) | Sensitivity (nm/mm) | Dynamic range (mm) | R <sup>2</sup> |
|-------------------|---------------------|--------------------|----------------|
| 5                 | -0.876              | 5                  | 0.9909         |
| 10                | -0.3892             | 4                  | 0.9954         |
| 15                | -0.691              | 2                  | 0.9811         |

# Results and Discussion – DS: 110 mm

- The sensor presents peaks shift of the transmittance spectrum due to the induced curvature and strain force;

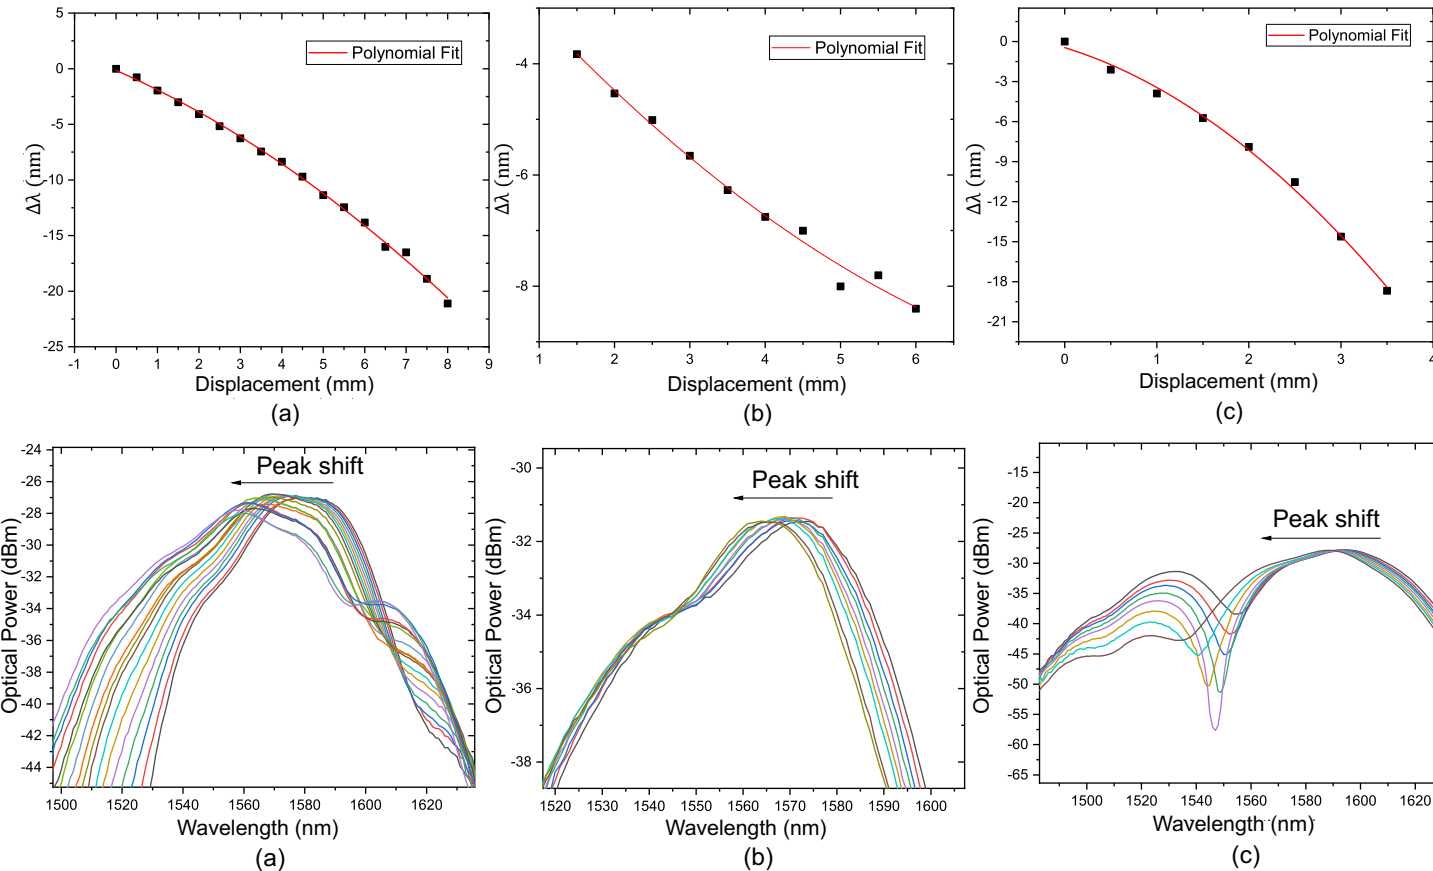

| Fixed points (mm) | Sensitivity (nm/mm) | Dynamic range (mm) | R <sup>2</sup> |
|-------------------|---------------------|--------------------|----------------|
| 5                 | -0.22               | 8                  | 0.9979         |
| 10                | -0.2284             | 4.5                | 0.9888         |
| 15                | -0.691              | 3.5                | 0.9892         |



# Conclusions

- The results demonstrate that it is possible to monitor the diameter using the strain gauge based on SMS sensor proposed in this work;
- The results present good sensitivities values, excellent coefficient of determination and dynamics ranges with several possibilities to practical application such as in pipelines and tree trunk growth;
- The next step will be to analyze other possible configurations since with the correct arrangement, it is possible to optimize the structure and their characteristics.

# Thank you for your attention!

## Questions?

*victorcard@ufpa.br*

**Funding:** This study was financed in part by the Brazilian Funding Agencies Conselho Nacional de Desenvolvimento Científico e Tecnológico (CNPq) and Coordenação de Aperfeiçoamento de Pessoal de Nível Superior (CAPES).

**Acknowledgments:** It was supported by the Federal University of Pará (UFPA) and the Military Institute of Engineering (IME) from Brazil and the Institute for Systems and Computer Engineering, Technology and Science (INESC TEC) and the Department of Physics and Astronomy, Faculty of Sciences of University of Porto from Portugal.
